# Supplementary material for: A spatial decision support system for enhancing resilience to floods. Bridging resilience modeling and geovisualization techniques
Source: Copernicus journal article supplement (doi:10.5194/nhess-2019-306), 2019-10-07
Supplement: Supplementary file [file nhess-2019-306-AC2-supplement.pdf]

## Answers to reviewers

### Reviewer 2:

| Remarks                                                                                                                                                                                                                                                                                                       | Answers                                                                                                                                                                                                                                                                                                                                                                                                                                                                                                                                                                                                                                                                                                                |
|---------------------------------------------------------------------------------------------------------------------------------------------------------------------------------------------------------------------------------------------------------------------------------------------------------------|------------------------------------------------------------------------------------------------------------------------------------------------------------------------------------------------------------------------------------------------------------------------------------------------------------------------------------------------------------------------------------------------------------------------------------------------------------------------------------------------------------------------------------------------------------------------------------------------------------------------------------------------------------------------------------------------------------------------|
| <p>It would be appropriate that the author illustrate with greater clarity the resilience indicators shown in Table 1. In particular, it should be clarified, especially with reference to urban resilience, if these indicators constitute a reference applicable in different locations and, if so, why</p> | <p>We have illustrated Table 1 with Figure 6. Furthermore, we added precisions:</p> <p>“Regarding the urban resilience indicator, INSEE data are available from 2009 to 2013, thus making it possible to perform a multi-date analysis over several years (Fig.12) and gain understanding of urban evolutions and resilience trends. For instance, certain elements have evolved, such as the proportion of tourist accommodation, and surgical and hospital activities, thereby increasing resilience capacities. Moreover, the advantage of using open data allows temporal as well as spatial scales to evolve, and the indicators can therefore be tested on other municipalities on the national territory. »</p> |
| <p>Figure 9 uses colors whose meaning is illegible and makes interpretation of the results difficult.</p>                                                                                                                                                                                                     | <p>We made changes on figure 9</p>                                                                                                                                                                                                                                                                                                                                                                                                                                                                                                                                                                                                                                                                                     |
